# Supplementary material
Source: HighWire-hosted journal article supplement (https://www.cancerbiomed.org/content/18/2/517)
Supplement: media-1 [file media-1.pdf]

## Supplementary materials

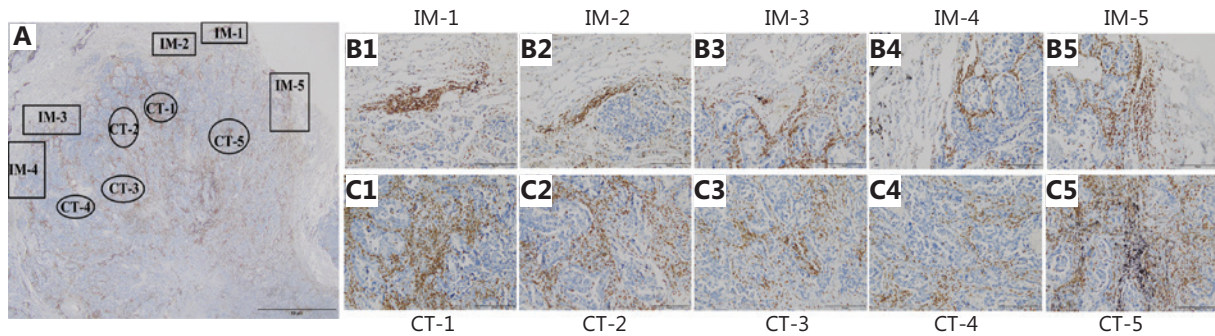

**Figure S1** Example CD3 IHC stained slide with the areas selected for quantification annotated. Under a light microscope (model BX51; Olympus), the staining was first evaluated according to overall impression at low magnification (×20) (A), and the 5 most representative areas in the invasive margin (IM) and the center of tumor (CT) region were selected (boxes represent the 5 representative IM areas selected, marked as IM-1, IM-2, IM-3, IM-4, and IM-5; ovals represent the 5 representative CT areas selected, marked as CT-1, CT-2, CT-3, CT-4, and CT-5). The densities of the positive cells were then scored at high magnification (200×) (B1–B5, C1–C5).

**Table S1** Antibody information and staining conditions

| Markers | Clone number   | Manufacturer | Dilution | Antigen retrieval                          |
|---------|----------------|--------------|----------|--------------------------------------------|
| CD3     | SP7            | Abcam        | 1:100    | Citrate buffer (pH 6.0)<br>microwave 3 min |
| CD20    | EP459Y         | Abcam        | 1:400    | Citrate buffer (pH 6.0)<br>microwave 3 min |
| CD57    | HNK-1/Leu-7    | Abcam        | 1:100    | Citrate buffer (pH 6.0)<br>microwave 3 min |
| CD66b   | /              | Abcam        | 1:100    | Citrate buffer (pH 6.0)<br>microwave 3 min |
| CD8     | C8/468+C8/144B | Abcam        | 1:100    | Citrate buffer (pH 6.0)<br>microwave 3 min |
| FoxP3   | 236A/E7        | Abcam        | 1:100    | Citrate buffer (pH 6.0)<br>microwave 3 min |
| CD45RO  | UCHL1          | CST          | 1:400    | Citrate buffer (pH 6.0)<br>microwave 3 min |
| CD68    | D4B9C          | CST          | 1:400    | Citrate buffer (pH 6.0)<br>microwave 3 min |
| CD45RA  | 4KB4           | ZSGB-BIO     | 1:50     | pH 9.0 EDTA (pH 9.0)<br>microwave 3 min    |

CST, Cell Signaling Technology; ZSGB-BIO, Zhongshan Golden Bridge Bio-technology, Beijing; EDTA, ethylenediamine tetraacetic acid.

**Table S2** The variables corresponding to each number in LASSO

| Number | Variable             |
|--------|----------------------|
| 1      | History of smoking   |
| 2      | Histologic style     |
| 3      | TNM stage            |
| 4      | NSE                  |
| 5      | CEA                  |
| 6      | Cyfra21-1            |
| 7      | CD8 <sub>CT</sub>    |
| 8      | CD8 <sub>IM</sub>    |
| 9      | CD66b <sub>CT</sub>  |
| 10     | CD45RO <sub>CT</sub> |
| 11     | CD45RO <sub>IM</sub> |
| 12     | FoxP3 <sub>CT</sub>  |

NSE, neuron-specific enolase; CEA, carcino-embryonic antigen; Cyfra21-1, cytokeratin 19 fragments; CT, center of tumor; IM, invasive margin.
